# Supplementary material
Source: publisher figshare collection journal article supplement (https://future-science-group.figshare.com/ndownloader/files/28220751)
Supplement: Supplementary file 1 [file 28220751]

**Supplementary Table 2. Procedures of interest.**

| **Procedure code** | **Procedure description** |
| --- | --- |
| 19120 | REMOVAL OF BREAST LESION |
| 19125 | EXCISION BREAST LESION |
| 19126 | EXCISION ADDL BREAST LESION |
| 19281 | PERQ DEVICE BREAST 1ST IMAG |
| 19282 | PERQ DEVICE BREAST EA IMAG |
| 19283 | PERQ DEV BREAST 1ST STRTCTC |
| 19284 | PERQ DEV BREAST ADD STRTCTC |
| 19285 | PERQ DEV BREAST 1ST US IMAG |
| 19286 | PERQ DEV BREAST ADD US IMAG |
| 19287 | PERQ DEV BREAST 1ST MR GUIDE |
| 19288 | PERQ DEV BREAST ADD MR GUIDE |
| 19290 | PLACE NEEDLE WIRE BREAST |
| 19291 | PLACE NEEDLE WIRE BREAST |
| 19294 | PREP TUM CAV IORT PRTL MAST |
| 19295 | PLACE BREAST CLIP PERCUT |
| 19296 | PLACE PO BREAST CATH FOR RAD |
| 19297 | PLACE BREAST CATH FOR RAD |
| 19298 | PLACE BREAST RAD TUBE/CATHS |
| 19301 | PARTIAL MASTECTOMY |
| 19302 | P-MASTECTOMY W/LN REMOVAL |
| 19303 | MAST SIMPLE COMPLETE |
| 19304 | MAST SUBQ |
| 19305 | MAST RADICAL |
| 19306 | MAST RAD URBAN TYPE |
| 19307 | MAST MOD RAD |
| 19340 | IMMEDIATE BREAST PROSTHESIS |
| 19342 | DELAYED BREAST PROSTHESIS |
| 19350 | BREAST RECONSTRUCTION |
| 19357 | BREAST RECONSTRUCTION |
| 19361 | BREAST RECONSTR W/LAT FLAP |
| 19364 | BREAST RECONSTRUCTION |
| 19366 | BREAST RECONSTRUCTION |
| 19367 | BREAST RECONSTRUCTION |
| 19368 | BREAST RECONSTRUCTION |
| 19369 | BREAST RECONSTRUCTION |
| 19370 | SURGERY OF BREAST CAPSULE |
| 19371 | REMOVAL OF BREAST CAPSULE |
| 19380 | REVISE BREAST RECONSTRUCTION |
| 19396 | DESIGN CUSTOM BREAST IMPLANT |
| 20660 | APPLY REM FIXATION DEVICE |
| 32701 | THORAX STEREO RAD TARGETW/TX |
| 33889 | ARTERY TRANSPOSE/ENDOVAS TAA |
| 33891 | CAR-CAR BP GRFT/ENDOVAS TAA |
| 34001 | REMOVAL OF ARTERY CLOT |
| 34051 | REMOVAL OF ARTERY CLOT |
| 34101 | REMOVAL OF ARTERY CLOT |
| 34715 | OPN AX/SUBCLA ART EXPOS |
| 34716 | OPN AX/SUBCLA ART EXPOS CNDT |
| 35001 | REPAIR DEFECT OF ARTERY |
| 35002 | REPAIR ARTERY RUPTURE NECK |
| 35005 | REPAIR DEFECT OF ARTERY |
| 35021 | REPAIR DEFECT OF ARTERY |
| 35022 | REPAIR ARTERY RUPTURE CHEST |
| 35301 | RECHANNELING OF ARTERY |
| 35311 | RECHANNELING OF ARTERY |
| 35390 | REOPERATION CAROTID ADD-ON |
| 35500 | HARVEST VEIN FOR BYPASS |
| 35501 | ART BYP GRFT IPSILAT CAROTID |
| 35506 | ART BYP GRFT SUBCLAV-CAROTID |
| 35507 | ARTERY BYPASS GRAFT |
| 35508 | ART BYP GRFT CAROTID-VERTBRL |
| 35509 | ART BYP GRFT CONTRAL CAROTID |
| 35510 | ART BYP GRFT CAROTID-BRCHIAL |
| 35511 | ART BYP GRFT SUBCLAV-SUBCLAV |
| 35512 | ART BYP GRFT SUBCLAV-BRCHIAL |
| 35515 | ART BYP GRFT SUBCLAV-VERTBRL |
| 35516 | ART BYP GRFT SUBCLAV-AXILARY |
| 35526 | ART BYP GRFT AOR/CAROT/INNOM |
| 35601 | ART BYP COMMON IPSI CAROTID |
| 35606 | ART BYP CAROTID-SUBCLAVIAN |
| 35612 | ART BYP SUBCLAV-SUBCLAVIAN |
| 35616 | ART BYP SUBCLAV-AXILLARY |
| 35626 | ART BYP AORSUBCL/CAROT/INNOM |
| 35642 | ART BYP CAROTID-VERTEBRAL |
| 35645 | ART BYP SUBCLAV-VERTEBRL |
| 35691 | ART TRNSPOSJ VERTBRL CAROTID |
| 35693 | ART TRNSPOSJ SUBCLAVIAN |
| 35694 | ART TRNSPOSJ SUBCLAV CAROTID |
| 35695 | ART TRNSPOSJ CAROTID SUBCLAV |
| 35701 | EXPLORATION CAROTID ARTERY |
| 36100 | ESTABLISH ACCESS TO ARTERY |
| 36221 | PLACE CATH THORACIC AORTA |
| 36222 | PLACE CATH CAROTID/INOM ART |
| 36223 | PLACE CATH CAROTID/INOM ART |
| 36224 | PLACE CATH CAROTD ART |
| 36227 | PLACE CATH XTRNL CAROTID |
| 36228 | PLACE CATH INTRACRANIAL ART |
| 37215 | TRANSCATH STENT CCA W/EPS |
| 37216 | TRANSCATH STENT CCA W/O EPS |
| 37217 | STENT PLACEMT RETRO CAROTID |
| 37246 | TRLUML BALO ANGIOP 1ST ART |
| 37247 | TRLUML BALO ANGIOP ADDL ART |
| 37600 | LIGATION OF NECK ARTERY |
| 37605 | LIGATION OF NECK ARTERY |
| 37606 | LIGATION OF NECK ARTERY |
| 60605 | REMOVE CAROTID BODY LESION |
| 61140 | PIERCE SKULL FOR BIOPSY |
| 61323 | DECOMPRESSIVE LOBECTOMY |
| 61333 | EXPLORE ORBIT/REMOVE LESION |
| 61500 | REMOVAL OF SKULL LESION |
| 61510 | REMOVAL OF BRAIN LESION |
| 61512 | REMOVE BRAIN LINING LESION |
| 61518 | REMOVAL OF BRAIN LESION |
| 61519 | REMOVE BRAIN LINING LESION |
| 61520 | REMOVAL OF BRAIN LESION |
| 61521 | REMOVAL OF BRAIN LESION |
| 61526 | REMOVAL OF BRAIN LESION |
| 61530 | REMOVAL OF BRAIN LESION |
| 61537 | REMOVAL OF BRAIN TISSUE |
| 61538 | REMOVAL OF BRAIN TISSUE |
| 61539 | REMOVAL OF BRAIN TISSUE |
| 61540 | REMOVAL OF BRAIN TISSUE |
| 61541 | INCISION OF BRAIN TISSUE |
| 61542 | REMOVAL OF BRAIN TISSUE |
| 61543 | REMOVAL OF BRAIN TISSUE |
| 61575 | SKULL BASE/BRAINSTEM SURGERY |
| 61576 | SKULL BASE/BRAINSTEM SURGERY |
| 61590 | INFRATEMPORAL APPROACH/SKULL |
| 61591 | INFRATEMPORAL APPROACH/SKULL |
| 61596 | TRANSCOCHLEAR APPROACH/SKULL |
| 61597 | TRANSCONDYLAR APPROACH/SKULL |
| 61600 | RESECT/EXCISE CRANIAL LESION |
| 61601 | RESECT/EXCISE CRANIAL LESION |
| 61605 | RESECT/EXCISE CRANIAL LESION |
| 61606 | RESECT/EXCISE CRANIAL LESION |
| 61607 | RESECT/EXCISE CRANIAL LESION |
| 61608 | RESECT/EXCISE CRANIAL LESION |
| 61611 | TRANSECT ARTERY SINUS |
| 61612 | TRANSECT ARTERY SINUS |
| 61615 | RESECT/EXCISE LESION SKULL |
| 61616 | RESECT/EXCISE LESION SKULL |
| 61697 | BRAIN ANEURYSM REPR COMPLX |
| 61698 | BRAIN ANEURYSM REPR COMPLX |
| 61700 | BRAIN ANEURYSM REPR SIMPLE |
| 61702 | INNER SKULL VESSEL SURGERY |
| 61703 | CLAMP NECK ARTERY |
| 61705 | REVISE CIRCULATION TO HEAD |
| 61708 | REVISE CIRCULATION TO HEAD |
| 61710 | REVISE CIRCULATION TO HEAD |
| 61711 | FUSION OF SKULL ARTERIES |
| 61750 | INCISE SKULL/BRAIN BIOPSY |
| 61751 | BRAIN BIOPSY W/CT/MR GUIDE |
| 61796 | SRS CRANIAL LESION SIMPLE |
| 61797 | SRS CRAN LES SIMPLE ADDL |
| 61798 | SRS CRANIAL LESION COMPLEX |
| 61799 | SRS CRAN LES COMPLEX ADDL |
| 61800 | APPLY SRS HEADFRAME ADD-ON |
| 77261 | RADIATION THERAPY PLANNING |
| 77262 | RADIATION THERAPY PLANNING |
| 77263 | RADIATION THERAPY PLANNING |
| 77280 | SET RADIATION THERAPY FIELD |
| 77285 | SET RADIATION THERAPY FIELD |
| 77290 | SET RADIATION THERAPY FIELD |
| 77293 | RESPIRATOR MOTION MGMT SIMUL |
| 77295 | 3-D RADIOTHERAPY PLAN |
| 77299 | RADIATION THERAPY PLANNING |
| 77300 | RADIATION THERAPY DOSE PLAN |
| 77301 | RADIOTHERAPY DOSE PLAN IMRT |
| 77305 | TELETX ISODOSE PLAN SIMPLE |
| 77306 | TELETHX ISODOSE PLAN SIMPLE |
| 77307 | TELETHX ISODOSE PLAN CPLX |
| 77310 | TELETX ISODOSE PLAN INTERMED |
| 77315 | TELETX ISODOSE PLAN COMPLEX |
| 77316 | BRACHYTX ISODOSE PLAN SIMPLE |
| 77317 | BRACHYTX ISODOSE INTERMED |
| 77318 | BRACHYTX ISODOSE COMPLEX |
| 77321 | SPECIAL TELETX PORT PLAN |
| 77326 | BRACHYTX ISODOSE CALC SIMP |
| 77327 | BRACHYTX ISODOSE CALC INTERM |
| 77328 | BRACHYTX ISODOSE PLAN COMPL |
| 77331 | SPECIAL RADIATION DOSIMETRY |
| 77332 | RADIATION TREATMENT AID(S) |
| 77333 | RADIATION TREATMENT AID(S) |
| 77334 | RADIATION TREATMENT AID(S) |
| 77336 | RADIATION PHYSICS CONSULT |
| 77338 | DESIGN MLC DEVICE FOR IMRT |
| 77370 | RADIATION PHYSICS CONSULT |
| 77371 | SRS MULTISOURCE |
| 77372 | SRS LINEAR BASED |
| 77373 | SBRT DELIVERY |
| 77385 | NTSTY MODUL RAD TX DLVR SMPL |
| 77386 | NTSTY MODUL RAD TX DLVR CPLX |
| 77387 | GUIDANCE FOR RADJ TX DLVR |
| 77399 | EXTERNAL RADIATION DOSIMETRY |
| 77401 | RADIATION TREATMENT DELIVERY |
| 77402 | RADIATION TREATMENT DELIVERY |
| 77403 | RADIATION TREATMENT DELIVERY |
| 77404 | RADIATION TREATMENT DELIVERY |
| 77406 | RADIATION TREATMENT DELIVERY |
| 77407 | RADIATION TREATMENT DELIVERY |
| 77408 | RADIATION TREATMENT DELIVERY |
| 77409 | RADIATION TREATMENT DELIVERY |
| 77411 | RADIATION TREATMENT DELIVERY |
| 77412 | RADIATION TREATMENT DELIVERY |
| 77413 | RADIATION TREATMENT DELIVERY |
| 77414 | RADIATION TREATMENT DELIVERY |
| 77416 | RADIATION TREATMENT DELIVERY |
| 77417 | RADIOLOGY PORT IMAGES(S) |
| 77418 | RADIATION TX DELIVERY IMRT |
| 77419 | WEEKLY RADIATION THERAPY MANAGEMENT |
| 77420 | WEEKLY RADIATION THERAPY MANAGEMENT |
| 77421 | STEREOSCOPIC X-RAY GUIDANCE |
| 77422 | NEUTRON BEAM TX SIMPLE |
| 77423 | NEUTRON BEAM TX COMPLEX |
| 77424 | IO RAD TX DELIVERY BY X-RAY |
| 77425 | IO RAD TX DELIVER BY ELCTRNS |
| 77427 | RADIATION TX MANAGEMENT X5 |
| 77430 | WEEKLY RADIATION THERAPY MANAGEMENT |
| 77431 | RADIATION THERAPY MANAGEMENT |
| 77432 | STEREOTACTIC RADIATION TRMT |
| 77435 | SBRT MANAGEMENT |
| 77469 | IO RADIATION TX MANAGEMENT |
| 77470 | SPECIAL RADIATION TREATMENT |
| 77499 | RADIATION THERAPY MANAGEMENT |
| 77520 | PROTON TRMT SIMPLE W/O COMP |
| 77522 | PROTON TRMT SIMPLE W/COMP |
| 77523 | PROTON TRMT INTERMEDIATE |
| 77525 | PROTON TREATMENT COMPLEX |
| 77750 | INFUSE RADIOACTIVE MATERIALS |
| 77761 | APPLY INTRCAV RADIAT SIMPLE |
| 77762 | APPLY INTRCAV RADIAT INTERM |
| 77763 | APPLY INTRCAV RADIAT COMPL |
| 77767 | HDR RDNCL SKN SURF BRACHYTX |
| 77768 | HDR RDNCL SKN SURF BRACHYTX |
| 77770 | HDR RDNCL NTRSTL/ICAV BRCHTX |
| 77771 | HDR RDNCL NTRSTL/ICAV BRCHTX |
| 77772 | HDR RDNCL NTRSTL/ICAV BRCHTX |
| 77776 | APPLY INTERSTIT RADIAT SIMPL |
| 77777 | APPLY INTERSTIT RADIAT INTER |
| 77778 | APPLY INTERSTIT RADIAT COMPL |
| 77781 | HIGH INTENSITY BRACHYTHERAPY |
| 77782 | HIGH INTENSITY BRACHYTHERAPY |
| 77783 | HIGH INTENSITY BRACHYTHERAPY |
| 77784 | HIGH INTENSITY BRACHYTHERAPY |
| 77785 | HDR BRACHYTX 1 CHANNEL |
| 77786 | HDR BRACHYTX 2-12 CHANNEL |
| 77787 | HDR BRACHYTX OVER 12 CHAN |
| 77789 | APPLY SURF LDR RADIONUCLIDE |
| 77790 | RADIATION HANDLING |
| 77799 | RADIUM/RADIOISOTOPE THERAPY |
| 0266T | IMPLT/RPL CRTD SNS DEV TOTAL |
| 0267T | IMPLT/RPL CRTD SNS DEV LEAD |
| 0268T | IMPLT/RPL CRTD SNS DEV GEN |
| 0269T | REV/REMVL CRTD SNS DEV TOTAL |
| 0270T | REV/REMVL CRTD SNS DEV LEAD |
| 0271T | REV/REMVL CRTD SNS DEV GEN |
| 0272T | INTERROGATE CRTD SNS DEV |
| 0273T | INTERROGATE CRTD SNS W/PGRMG |
| 3100F | IMAGE TEST REF CAROT DIAM |
| 3550F | LOW RSK THROMBOEMBOLISM |
| G0173 | LINEAR ACC STEREO RADSUR COM |
| G0251 | LINEAR ACC BASED STERO RADIO |
| G0339 | ROBOT LIN-RADSURG COM, FIRST |
| G0340 | ROBT LIN-RADSURG FRACTX 2-5 |
| G6003 | RADIATION TREATMENT DELIVERY |
| G6004 | RADIATION TREATMENT DELIVERY |
| G6005 | RADIATION TREATMENT DELIVERY |
| G6006 | RADIATION TREATMENT DELIVERY |
| G6007 | RADIATION TREATMENT DELIVERY |
| G6008 | RADIATION TREATMENT DELIVERY |
| G6009 | RADIATION TREATMENT DELIVERY |
| G6010 | RADIATION TREATMENT DELIVERY |
| G6011 | RADIATION TREATMENT DELIVERY |
| G6012 | RADIATION TREATMENT DELIVERY |
| G6013 | RADIATION TREATMENT DELIVERY |
| G6014 | RADIATION TREATMENT DELIVERY |
| G6015 | RADIATION TX DELIVERY IMRT |
| G6016 | DELIVERY COMP IMRT |
